1 Temperature accounts for the biodiversity of a hyperdiverse group of insects in urban Los  
2 Angeles

3

4

5 Terrence P. McGlynn\*<sup>1,2</sup>, Emily K. Meineke\*<sup>3</sup>, Christie A. Bahlai<sup>4</sup>, Enjie Li<sup>2</sup>, Emily A.  
6 Hartop<sup>2,5</sup>, Benjamin J. Adams<sup>2</sup>, and Brian V. Brown<sup>2</sup>

7

8 \*Authors contributed equally to this work

9

10 <sup>1</sup> Department of Biology, California State University Dominguez Hills, Carson, CA 90747, USA

11 <sup>2</sup> Urban Nature Research Center, Natural History Museum of Los Angeles County, Los Angeles, CA 90007, USA

12 <sup>3</sup> Department of Organismic and Evolutionary Biology, Harvard University, Cambridge, MA 02138, USA

13 <sup>4</sup> Department of Biological Sciences, Kent State University, Kent, OH 44242, USA.

14 <sup>5</sup> Department of Zoology, Stockholm University, SE-106 91 Stockholm, Sweden

15

16

17

18

19 **Abstract**

20 The urban heat island effect is a worldwide phenomenon that has been linked to species'  
21 distributions and abundances in cities. However, effects of urban heat on biotic communities are  
22 nearly impossible to disentangle from effects of land cover in most cases because hotter urban  
23 sites also have less vegetation and more impervious surfaces than cooler sites within cities. We  
24 sampled phorid flies, one of the largest, most biologically diverse families of true flies (Insecta:  
25 Diptera: Phoridae), at 30 sites distributed within the central Los Angeles Basin, where we found  
26 that temperature and the density of urban land cover are decoupled. Abundance, richness, and  
27 community composition of phorids inside urban Los Angeles were most parsimoniously  
28 accounted for by mean air temperature in the week preceding sampling. Sites with intermediate  
29 mean temperatures had more phorid fly individuals and higher richness. Communities were more  
30 even at urban sites with lower minimum temperatures and sites located further away from natural  
31 areas, suggesting that communities separated from natural source populations may be more  
32 homogenized. Species composition was best explained by minimum temperature. Inasmuch as  
33 warmer areas within cities can predict future effects of climate change, phorid fly communities  
34 are likely to shift non-linearly under future climates in more natural areas. Exhaustive surveys of  
35 biotic communities within cities, such as the one we describe here, can provide baselines for  
36 determining the effects of urban and global climate warming as they intensify.

37

38 Keywords: climate change, species richness, phorid fly, urban heat island

39

## 40 **Introduction**

41           Urban development is accelerating with uncertain effects on biodiversity. While many  
42 species do not persist in urban areas, cities can support a surprising range of native and even  
43 threatened taxa [1,2]. Thus, determining conditions within cities that affect species persistence is  
44 increasingly a focus of ecological research from fundamental and conservation perspectives [3–  
45 5]. However, isolating specific drivers of biodiversity in cities has proven difficult because  
46 organisms in cities experience a range of novel conditions that may alter their abundances and  
47 distributions [6–8]. Therefore, for most animal taxa, specific mechanisms driving community  
48 assembly in cities remain unknown.

49           The urban heat island effect is a prevalent phenomenon in cities, and growing evidence  
50 shows that urban heat can alter species richness, abundance, and community composition [9–15].  
51 Urbanization causes cities to be as much as 12°C hotter than adjacent areas [16], which is on par  
52 or above warming anticipated by the Intergovernmental Panel on Climate Change over the next  
53 several decades [17]. In certain cities, urban warming can also operate at local scales, creating  
54 thermal mosaics within the urban matrix (e.g., [18–21]). Despite the short history of research on  
55 the biotic effects of urban heat, researchers have found important patterns across diverse taxa  
56 [7,10–13,22–24]. For example, remnant native plant communities in urban environments may be  
57 altered under warming conditions, favoring more xerophilic species [25,26].

58           Because temperatures in cities match or exceed those expected under future climate  
59 change, researchers have suggested that thermal gradients within cities might allow us to predict  
60 biotic responses to the future climate warming [27,28]. Cities might be useful proxies for climate  
61 warming because urban heat has been in place for decades to centuries, and large scale,  
62 controlled warming experiments in more natural areas are often impractical (but see [29,30]).

63 However, urban heat might not be an appropriate proxy for broader climate warming because  
64 other aspects of urbanization might also have strong effects on species. Perhaps most  
65 importantly, land cover (impervious surfaces, vegetation) and urban heat tend to covary, making  
66 it impossible to separate their effects on biological processes. Hot urban environments often have  
67 more impervious surface, less vegetation cover, and lower vegetation complexity [31–33]. While  
68 researchers have used various useful approaches to determine effects of urban warming alone –  
69 e.g., laboratory chamber experiments [11,18] – actually separating effects of land cover and  
70 temperature in the city could provide insight into whether biotic responses are more attributable  
71 to temperature or other aspects of urbanization. In coastal cities, urban temperatures are often  
72 decoupled from landcover, such that sites that are highly urbanized are not necessarily hotter  
73 than surrounding sites that are less urbanized because of winds entering from the coast [40]. This  
74 offers an experimental opportunity to separate the ecological effects of urbanization and  
75 temperature.

76 Insects are highly responsive to temperature, are a foundational component of terrestrial  
77 biodiversity, and provide a range of services and disservices within cities [34,35]. As insects are  
78 ectotherms, they have elevated metabolic and reproductive rates in response to warming until  
79 their thermal maxima are reached [14]. One of the most abundant animals in terrestrial  
80 environments are phorid flies [36,37], which are responsive to thermal conditions, but also feed  
81 on a wide range of resources and develop and occupy a tremendous variety of microhabitats [38].  
82 Cities can support hyperdiverse communities of phorid flies, with dozens of species recently  
83 described from central Los Angeles [39,40]. With a small body size (0.4–6 mm) and presumably  
84 short dispersal distances, we would expect phorid fly biodiversity to finely track microclimatic  
85 conditions in the urban environment, relative to less ephemeral or larger-sized organisms.

86 Here we evaluate the spatial and temporal predictors of phorid fly biodiversity within  
87 urban Los Angeles, CA, USA, hereafter we refer to as L.A. In L.A., urban temperatures are  
88 decoupled from land cover, allowing us to investigate the effects of impervious  
89 surface, vegetation cover, and temperature, in a system where these aspects of the urban  
90 environment are not highly correlated [41]. In this project, species were sampled exhaustively  
91 [42], and 30 new species of flies were described from L.A. from this dataset in 2015 [39]. We  
92 leverage the complete documentation of this diverse group to determine effects of urban land  
93 development and climate in a city where we found these variables are uniquely decoupled. We  
94 sampled phorid flies and site environmental conditions in 30 locations throughout a calendar  
95 year to evaluate biodiversity responses to thermal and urbanization gradients within the L.A.  
96 metropolitan area. By measuring temperature and moisture variables at a very fine scale to match  
97 the habitat occupied by the organisms [43], we achieve a biologically relevant understanding of  
98 how local climatic factors vary across an iconic urban habitat.

99

## 100 **Methods**

### 101 Study area

102 The Los Angeles metropolitan area is a highly urbanized region located at 34°N along the west  
103 coast of North America, which has experienced rapid population growth and associated land  
104 development over the past 100 years. The climate and flora are characteristically  
105 “Mediterranean,” and biomes that have given way to development include coastal sage scrub,  
106 chaparral, and oak woodlands. Some habitats have only small fragments remaining, including  
107 coastal dunes and wetlands [44]. The climate of locations within the city can vary substantially  
108 from one another, because of differences in distance from the ocean, elevation, intensity of

109 urbanization, and vegetation [41]. The heterogeneity of the landscape makes predicting climatic  
110 differences among sites in Los Angeles particularly difficult [45,46], which reinforces the need  
111 for site-specific weather records to reliably compare sites.

112

### 113 *Study design and insect sampling procedures*

114 We placed a series of Malaise traps [47] (Townes lightweight model Sante Traps,  
115 Lexington, KY) in 30 sites throughout central L.A. (Fig. 1). The distribution of the sites was  
116 designed to capture a range of biotic and abiotic gradients in the urban environment as part of the  
117 BioSCAN (Biodiversity Science: City and Nature) project of the Natural History Museum of Los  
118 Angeles County (LACM). The initial findings from this sampling are described by Brown and  
119 Hartop [42], who provide a detailed description of each site featured in the study. [In a survey,](#)  
120 [participants whose homes were included in the study were asked if they used pesticides in their](#)  
121 [yards in areas close to where the traps were located. The survey revealed that none of the sites](#)  
122 [were treated with pesticides regularly, and only a few hosts used small quantities of pesticides](#)  
123 [for local control on rare occasions, such as neem oil on a few plants. We decided this incidental](#)  
124 [treatment would not appreciably affect biodiversity within the yards included in this study.](#)

125 For each of twelve sampling periods (approximately the first week of each month in  
126 2014), we collected and identified all phorid flies in samples to species, resulting in a total of  
127 42,480 specimens, . Vouchers are deposited in the LACM. Over this year of sampling, the fauna  
128 of 99 species was essentially sampled to completion, as richness estimators predicted that  
129 additional sampling would be expected to yield perhaps one additional new species [42]. We are  
130 confident that this sampling regime represents nearly all the species in this lineage and locality  
131 that would be captured using this sampling approach.

132

133 *Abiotic data collection and processing*

134 We continuously recorded air temperature, soil temperature, and relative humidity at each site  
135 using a weather station adjacent to each trap (Onset HOBO U30 Station, Bourne, MA).

136 Additional details about abiotic data are in the electronic supplementary material.

137

138 *Statistical Analyses*

139 **Correlations between environmental and climatic predictors:** To determine the relative  
140 contribution of urbanization and topography on microclimates across our study region, we used  
141 two simple linear models to test whether impervious surface and/or elevation were predictive of  
142 mean average annual air temperature at our sampling sites. In each model, mean average annual  
143 temperature was the response variable, and impervious surface or elevation was the sole  
144 predictor. We also evaluated whether differences in temperatures across sites were associated  
145 with a coastal effect from the Pacific Ocean. Our hypothesis was that urban sites further away  
146 from the coast would have warmer mean temperatures [50]. To test this, we also used a simple  
147 linear model, with distances from our sites to the Pacific shoreline as the predictor and mean  
148 average annual air temperature as the response variable.

149

150 **Phorid fly abundance, richness, and evenness:** We first calculated four response variables that  
151 were each used as the responses in the modeling framework described below. First, we  
152 calculated the total number of individuals caught per trap per day (abundance), species richness,  
153 and Pielou evenness. Because the traps were in place for slightly different amounts of time  
154 during some sampling periods, we divided each response variable by the number of days a trap

155 was left out, i.e., the total amount of time flies had access to a trap. One species, *M. agarici*,  
156 constituted a substantial number of specimens in samples at many sites (and about one-quarter of  
157 all individuals collected). Therefore, we included total individuals of this species captured per  
158 trap per day as an additional response variable. (Many of the species in this study were only  
159 recently described and their biology remains poorly known, and the current state of knowledge  
160 [51] prevents us from using taxon-specific data, such as phylogeny, diet, as factors in the models  
161 described below.)

162         As a preliminary step, we used model selection to minimize overfitting in the final  
163 models. Specifically, we used model selection to identify the most parsimonious independent  
164 variables describing effects of temperature, humidity, and urbanization on each response  
165 variable. For each response, we built a series of linear mixed effects models in the *nlme* package  
166 in R [52]. In each case below, we compared models with tightly correlated predictors describing  
167 similar aspects of the urban environment and selected the parameter in the model with the lowest  
168 AICc score to include in full models used for inference, i.e., to choose the response variable most  
169 closely associated with the response. For each response variable, we compared three sets of  
170 models. One set included mean RH (relative humidity), maximum RH, minimum RH, and no  
171 humidity predictor. The second set of models selected from included mean temperature,  
172 maximum temperature, minimum temperature, and no temperature predictor, and the final set  
173 compared mean soil temperature, mean maximum soil temperature, mean minimum soil  
174 temperature, and no temperature predictor. All climatic predictors represented average conditions  
175 one week before sampling to represent the conditions most likely to affect phenology [53]. We  
176 decided, depending on the shape of the response, whether to include a squared term to account  
177 for non-linear responses of phorid flies to environmental variables. In all models built for final



178 model selection, we included latitude, longitude, and distance to the nearest natural, protected  
179 area were included as fixed effects, and site was included as a random effect to account for  
180 repeated sampling of flies at each site. To account for the composition of the matrix surrounding  
181 each study site and to describe urbanization, we compared models that included impervious  
182 surface cover, NDVI – each measured at a 50-m buffer as described above – and neither of these  
183 (null model).

184         After selecting parameters for each response variable (species richness, *M. agarici*  
185 abundance, total abundance, and evenness), we built one full model for each, for a total of four  
186 models. In these models, we included each parameter chosen to represent urbanization,  
187 temperature, and humidity, along with latitude, longitude, and distance to the nearest natural area  
188 as fixed effects. Site was included as a random effect in all models. To determine if the effects of  
189 temperature depended on water availability, and vice versa, we included an interaction between  
190 the best temperature predictor and the best relative humidity predictor; these were subsequently  
191 removed from all models because they were not significant. We did not include any interaction  
192 effects that were not associated with explicit *a priori* hypotheses, because these interaction  
193 effects often can be explained more directly by main effects of environmental variables, and  
194 including these variables would be redundant and reduce the power of analyses of our main  
195 effects. To determine if site proximity rather than environmental conditions may account for  
196 responses we observed, we performed an analysis to test if spatial autocorrelation was observed  
197 among sample sites. We examined abundance of phorid flies by date, for every date where >5  
198 sites reported data, using Moran's I, applied to an inverse distance matrix of site co-ordinates as  
199 the weighting factor [54].

200

201 **Community composition:** In addition to the univariate community responses, we also  
202 conducted a non-metric multi-dimensional scaling (NMDS) analysis to examine patterns in  
203 community composition, and fit environmental vectors to gain insights into drivers of these  
204 patterns [55]. For this analysis, we used all captures of phorid flies at a given site, across the  
205 whole sampling period. We culled all singletons (species represented by a single sample  
206 throughout the entire study), a standard approach because the incidence of a singleton is  
207 indistinguishable from a spurious occurrence [56]. The NMDS was conducted on the Bray-Curtis  
208 distance calculated from the untransformed matrix of taxon-by-site using abundance values.  
209 Environmental fit vectors were selected iteratively by comparing the fit statistics (Global  $R^2$  and  
210  $p$ -value) within a group of related, and auto-correlated, parameters (e.g., minimum, maximum  
211 and mean air temperatures, etc.).

212

## 213 **Results**

214 **Correlations between environmental variables and urbanization:** Measured mean annual  
215 temperatures at our study sites were independent of impervious surface and elevation (Fig. 2;  
216 impervious surface:  $y = -129 + 9x$ ,  $F_{1,28} = 1.12$ ,  $p = 0.30$ ; elevation:  $y = -45 + 4.5x$ ,  $F_{1,28} = 0.02$ ,  $p =$   
217  $0.90$ ), suggesting that neither urban land cover nor elevation drove urban temperatures.  
218 Therefore, we conclude that, while L.A. may have a largescale urban heat island effect, other  
219 unknown factors drive temperatures at the local scale. As expected, NDVI tracked impervious  
220 surface, though these values were not closely related to the distance to natural areas (Fig. S1).  
221 Contrary to expectations, temperatures measured at weather stations in urban backyards were not  
222 significantly associated with their distances from the coast ( $y = 1.90 + 1.83e^{-5}x$ ,  $F_{1,28} = 0.48$ ,  $p =$   
223  $0.49$ ).

224

225 **Mean and peak biotic responses:** Abundance and richness of phorid fly communities

226 throughout the city were best explained by air temperature (Table 1; Fig. 3). No other climatic

227 parameters had significant predictive value, aside for a lesser effect of relative humidity on

228 species richness (Table 1), and humidity slightly tracked temperature (Fig. S3). Phorid fly

229 abundance and richness responses to environmental conditions were nonlinear, with peaks at

230 intermediate mean weekly temperatures (Fig. S1). The factors affecting the abundance of the

231 most common species, *M. agarici*, were the same factors affecting total abundance (Table 1).

232 Evenness of phorid fly communities was weakly explained by mean minimum weekly

233 temperature and distance to natural areas, such that phorid fly communities in areas with lower

234 minimum temperatures and those that were further away from natural were more even (Table 1).

235 Latitude and longitude were associated with abiotic conditions (Figs. S4, S5), but spatial

236 autocorrelation was limited. Among all dates where sufficient data existed for autocorrelation

237 analysis (10 dates), one date (Week 6 of 2014) had significant spatial autocorrelation ( $p= 0.037$ ),

238 suggesting that autocorrelation is rare in this system and may have been observed by chance.

239 Thus, after we accounted for spatial similarity of sites using latitude and longitude as described

240 above, no additional correction for spatial autocorrelation was needed.

241

242 **Community composition:** The effects of NDVI and mean minimum weekly temperature on

243 species composition were orthogonal, with a much greater effect of temperature (Fig. 4). Mean

244 minimum weekly temperature had the only significant vector, which also had the greatest

245 magnitude ( $r^2= 0.26$ ,  $p= 0.02$ )

246

247 **Discussion**

248           We found that urbanization and climate are uniquely decoupled across the L.A. Basin.  
249 Consistent with an earlier study [41], urban land cover does not influence local temperatures at  
250 the fine scale of our sampling. Because of this decoupling, we were able to independently assess  
251 effects of local climate and urban land cover on phorid fly communities. We found that air  
252 temperature had the most robust influence on the assembly of the phorid fly community, but that  
253 different aspects of temperature were most closely associated with species abundance, richness,  
254 and evenness. Local impervious surface and vegetation cover (NDVI), which represent  
255 urbanization, did not outperform null models. We conclude that local climate, not urban land  
256 cover, is the strongest driver of phorid fly community assembly across Los Angeles.

257           Higher mean temperatures were associated with increased phorid fly richness, until  
258 around 20°C, where richness declined. We predicted that cooler sites would harbor more species  
259 because warmer areas would be associated with reduced persistence of heat-intolerant species.  
260 However, we find evidence that intermediate temperatures may support both heat-tolerant and -  
261 intolerant species, and thus most phorid species in L.A. Many of the species in our study (e.g.,  
262 *M. halterata*, *M. nigra*, and *M. pleuralis*) are probably introduced from areas of northern Europe  
263 with cooler thermal conditions than L.A., which could also account in part for the loss of  
264 abundance at higher mean temperatures. However, in general, the relative contributions of non-  
265 native and native species to the patterns we observed are unclear. While we know that many  
266 species of phorids in L.A. are native based on their species interactions and/or distributions (i.e.,  
267 found only in certain parts of North America in well-studied groups), knowledge about phorid  
268 fly distributions is inadequate to inform us to what extent non-native species contribute to the  
269 patterns we observe.

270           While species richness was tied to mean temperature, evenness was weakly explained by  
271   minimum temperature and distance to natural areas. The latter was included in the analysis  
272   because it is well established that some species have habitat requirements involving larger  
273   patches of land that are less urbanized. For example, the ant-decapitating guild of phorid flies are  
274   only found within and adjacent to natural areas because these are locations in L.A. where their  
275   hosts (species of *Camponotus*, *Crematogaster*, *Liometopum*, *Neivamyrmex*, *Pheidole*, and  
276   *Solenopsis*) are found. Elsewhere, the host ants are typically displaced by invasive Argentine  
277   ants [42,57]. We expected that species richness would drop with distance from natural areas, as  
278   certain native species would be removed from the species pool. Instead, we found that species  
279   evenness might be the result of a more complex process, in which communities become less even  
280   further from natural areas, but not because of the loss of species from communities – distance  
281   from natural areas did not predict richness – but rather because relative abundances may shift.  
282   Our results suggest that a subset of species may benefit from living further from natural areas,  
283   where perhaps there is less competition from species that may locally disperse into more  
284   urbanized environments from source populations in more natural areas. While we predict this  
285   may be the cause of less even communities further from natural, protected areas, further studies  
286   on population genomics and niche overlap of phorid flies are needed to determine mechanisms  
287   driving this pattern. In addition, sites with lower minimum temperatures support compositionally  
288   different and more even communities than areas with higher minimum temperatures. We may  
289   observe this pattern because a few species in the region have disproportionate fitness benefits  
290   from warmer minima.

291           Species richness was also higher at intermediate relative humidities, and we suspect this  
292   results from the benefits and drawbacks of wet climates for insects. Throughout the year, many

293 species showed large spikes in abundance. Among those with known life histories (as listed in  
294 Fig. 4: *Chonocephalus bentacaisei*, *M. agarici*, *M. halterata*, *M. marquezii*, *M. nigra*, and *M.*  
295 *pleuralis*) fungus-feeding larvae are overwhelmingly common. Sporophore eruptions can  
296 produce hundreds of flies relatively quickly, as Brown & Hartop [58,59] estimated a single  
297 mushroom cap contained 500 larvae of *M. marquezii*. We suspect abundance peaks for these  
298 species are associated with the mass production of fungal sporophores in close proximity to our  
299 sampling area, which are common after rain. However, we also suspect that very wet climates  
300 may increase fungal disease incidence [60,61], such that highest phorid fly richness occurs at  
301 intermediate relative humidity.

302 Urban landscapes are rarely designed to sustain biodiversity, though this is often an  
303 idealized goal informed by research [62]. At very high levels of heat, abundance and diversity  
304 declines, which is consistent with other studies suggesting that the urban heat island effect has  
305 negative effects on many species [14,63,64]. As the global temperature increases, many of the  
306 sites we sampled may also warm and therefore no longer support diverse phorid fly  
307 communities, though this will depend on how quickly phorid flies can adapt to changing thermal  
308 conditions. Even on short timescales, it is possible that the thermal limits of species have  
309 evolved, so that animals in the warmer parts of the city are capable of tolerating warmer  
310 conditions independent of ecotypic acclimation [65]. Given the rapid evolution of thermal  
311 tolerance in other arthropods [65–67], and the short generation times of phorid flies, rapid  
312 adaptation to climate change might be possible.

313 Our work was designed to test how the urban matrix surrounding sites in urban Los  
314 Angeles affects insect biodiversity. Our analyses suggest that temperature is a more important  
315 variable than surrounding urban land cover (impervious surface and NDVI densities) for

316 determining fly abundance and richness. However, a more detailed analysis of the specific  
317 habitat types between potential source communities in protected, more natural sites and urban  
318 sites might reveal patterns we have not tested for. Specifically, we predict that if protected areas  
319 are source populations for urban fly biodiversity, protected areas and urban sites with more  
320 hospitable habitat between (more NDVI, for example), may have higher fly diversity. Assessing  
321 the specific land cover types between protected areas and urban sites is an important area for  
322 future studies. We also note that our study did not take into account plant species composition,  
323 including the amount of native vs. non-native plant cover. Prior work has shown that the amount  
324 of native vegetation [68], vegetation complexity [69,70], and plant diversity [71] can drive urban  
325 insect diversity. Investigating plant species composition of the matrix around sites and intra-  
326 urban corridors among sites may help explain patterns in diversity that are not accounted for in  
327 our analyses. Exhaustive biodiversity sampling has reaped substantial rewards in understanding  
328 how environmental change across space affects biodiversity [72,73]. While labor intensive, our  
329 approach created a foundational understanding of which species occur in the phorid fly  
330 community, a presumably informative subset of the entire insect community. Baseline  
331 knowledge of insect communities is a prerequisite for generating expected responses to  
332 continued global change. These data are rare, but sampling programs like the one we describe  
333 here could be replicated in other cities to build baselines that allow us to determine how biotic  
334 change varies across background climates and habitat types. However, our robust sampling of  
335 the L.A. Basin relied on collaboration between scientists and the public. Members of the  
336 community hosted Malaise traps in their backyards, increasing the range of urban environments  
337 available for sampling, and, importantly, reducing the resources and labor required for this  
338 intensive sampling [74]. With continued public support, efforts such as ours could create long-

339 term data for describing species' long-term responses to urbanization and climate change  
340 [75,76].

341

### 342 **Authors' Contributions**

343 The BioSCAN project was conceived and operated by BVB, and taxonomy and identification of  
344 flies was conducted by BVB and EAH. Data curation and analyses were conducted by EKM and  
345 CAB. Spatial data for analyses and maps were provided by EL. The manuscript was written by  
346 TPM, with contributions from EKM, BVB, BJA, EL, and CAB.

347

### 348 **Acknowledgments**

349 BioSCAN is a large project, funded by the LACM, its donors, and grants from the Seaver  
350 Foundation and the Rose Hills Foundation. We thank the many staff, supporters, and volunteers  
351 who have made the project possible, especially Luis Chiappe, Victoria Dean, Esther Chao, Lisa  
352 Gonzalez, Estella Hernandez, Lila Higgins, Tom Jacobson, Diane Naegele, Greg Pauly, Dean  
353 Pentcheff, Chris Thacker, Jann Vendetti, Regina Wetzler, and Maria Wong. We thank the  
354 families and representatives of organizations whose homes or yards were made available to us  
355 for sampling, including Celeste Armstrong, Natalie Brejcha, Chris Cianci, Glen Creason, Teresa  
356 Dahl, Betty Defibaugh, Julian Donahue, Candace Franco, Ray Fujioka, Victoria Harding, Tony  
357 Hein, Peggy Hentschke, Sidney Higgins, Jim Hogue, Jeff Koch, Erin Johnson, Eric Keller,  
358 Patricia Lombard, Pauline Louie, Humberto Marquez, Sharon Oxborough, Mark Pisano, Peter  
359 Ralph, Walter Renwick, John Rodriguez, LaChristian Steptoe, and K.T. Wiegman. TPM was  
360 supported by a sabbatical and RSCA awards from CSUDH and by NSF (OISE-1261015)

361



362 **References**

- 363 1. Lundholm JT, Marlin A. 2006 Habitat origins and microhabitat preferences of urban plant  
364 species. *Urban Ecosyst.* (doi:10.1007/s11252-006-8587-4)
- 365 2. Aronson MFJ *et al.* 2014 A global analysis of the impacts of urbanization on bird and  
366 plant diversity reveals key anthropogenic drivers. *Proc. R. Soc. B Biol. Sci.*  
367 (doi:10.1098/rspb.2013.3330)
- 368 3. McKinney ML. 2002 Urbanization, Biodiversity, and Conservation. *Bioscience*  
369 (doi:10.1641/0006-3568(2002)052[0883:UBAC]2.0.CO;2)
- 370 4. Gómez-Baggethun E *et al.* 2013 Urban Ecosystem Services. In *Urbanization, Biodiversity*  
371 *and Ecosystem Services: Challenges and Opportunities*, (doi:10.1007/978-94-007-7088-1)
- 372 5. Potter A, LeBuhn G. 2015 Pollination service to urban agriculture in San Francisco, CA.  
373 *Urban Ecosyst.* (doi:10.1007/s11252-015-0435-y)
- 374 6. Alberti M. 2005 The effects of urban patterns on ecosystem function. *Int. Reg. Sci. Rev.*  
375 (doi:10.1177/0160017605275160)
- 376 7. Shochat E, Warren PS, Faeth SH, McIntyre NE, Hope D. 2006 From patterns to emerging  
377 processes in mechanistic urban ecology. *Trends Ecol. Evol.*  
378 (doi:10.1016/j.tree.2005.11.019)
- 379 8. Lin BB, Philpott SM, Jha S. 2015 The future of urban agriculture and biodiversity-  
380 ecosystem services: Challenges and next steps. *Basic Appl. Ecol.*  
381 (doi:10.1016/j.baae.2015.01.005)
- 382 9. Yuan F, Bauer ME. 2007 Comparison of impervious surface area and normalized  
383 difference vegetation index as indicators of surface urban heat island effects in Landsat  
384 imagery. *Remote Sens. Environ.* **106**, 375–386.

- 385 (doi:<https://doi.org/10.1016/j.rse.2006.09.003>)
- 386 10. Meineke EK, Dunn RR, Frank SD. 2014 Early pest development and loss of biological  
387 control are associated with urban warming. *Biol. Lett.* **10**. (doi:10.1098/rsbl.2014.0586)
- 388 11. Meineke EK, Frank SD. 2018 Water availability drives urban tree growth responses to  
389 herbivory and warming. *J. Appl. Ecol.* (doi:10.1111/1365-2664.13130)
- 390 12. Meineke E, Youngsteadt E, Dunn RR, Frank SD. 2016 Urban warming reduces  
391 aboveground carbon storage. *Proc. R. Soc. B Biol. Sci.* (doi:10.1098/rspb.2016.1574)
- 392 13. Meineke EK, Holmquist AJ, Wimp GM, Frank SD. 2017 Changes in spider community  
393 composition are associated with urban temperature, not herbivore abundance. *J. Urban  
394 Ecol.* (doi:10.1093/jue/juw010)
- 395 14. Hamblin AL, Youngsteadt E, López-Uribe MM, Frank SD. 2017 Physiological thermal  
396 limits predict differential responses of bees to urban heat-island effects. *Biol. Lett.* **13**.
- 397 15. Dale AG, Frank SD. 2018 Urban plants and climate drive unique arthropod interactions  
398 with unpredictable consequences. *Curr. Opin. Insect Sci.*  
399 (doi:<https://doi.org/10.1016/j.cois.2018.06.001>)
- 400 16. Oke TR. 1973 City size and the urban heat island. *Atmos. Environ.* **7**, 769–779.  
401 (doi:[https://doi.org/10.1016/0004-6981\(73\)90140-6](https://doi.org/10.1016/0004-6981(73)90140-6))
- 402 17. IPCC. 2014 *Summary for Policymakers*. (doi:10.1017/CBO9781107415324)
- 403 18. Meineke EK, Dunn RR, Sexton JO, Frank SD. 2013 Urban Warming Drives Insect Pest  
404 Abundance on Street Trees. *PLoS One* **8**, 1–7. (doi:10.1371/journal.pone.0059687)
- 405 19. Dale AG, Frank SD. 2014 Urban warming trumps natural enemy regulation of  
406 herbivorous pests. *Ecol. Appl.* (doi:10.1890/13-1961.1)
- 407 20. Tibbetts EA, Dale J. 2004 A socially enforced signal of quality in a paper wasp. **432**, 218–

- 408 222. (doi:10.1038/nature03004.1.)
- 409 21. Dale AG, Frank SD. 2017 Warming and drought combine to increase pest insect fitness on  
410 urban trees. *PLoS One* (doi:10.1371/journal.pone.0173844)
- 411 22. Neil K, Wu J. 2006 Effects of urbanization on plant flowering phenology: A review.  
412 *Urban Ecosyst.* (doi:10.1007/s11252-006-9354-2)
- 413 23. Somers KA, Bernhardt ES, Grace JB, Hassett BA, Sudduth EB, Wang S, Urban DL. 2013  
414 Streams in the urban heat island: spatial and temporal variability in temperature. *Freshw.*  
415 *Sci.* (doi:10.1899/12-046.1)
- 416 24. Faeth SH, Bang C, Saari S. 2011 Urban biodiversity: Patterns and mechanisms. *Ann. N. Y.*  
417 *Acad. Sci.* (doi:10.1111/j.1749-6632.2010.05925.x)
- 418 25. Taha H. 1997 Urban climates and heat islands: albedo, evapotranspiration, and  
419 anthropogenic heat. *Energy Build.* (doi:10.1016/S0378-7788(96)00999-1)
- 420 26. Luo Z, Sun OJ, Ge Q, Xu W, Zheng J. 2007 Phenological responses of plants to climate  
421 change in an urban environment. *Ecol. Res.* (doi:10.1007/s11284-006-0044-6)
- 422 27. Youngsteadt E, Dale AG, Terando AJ, Dunn RR, Frank SD. 2015 Do cities simulate  
423 climate change? A comparison of herbivore response to urban and global warming. *Glob.*  
424 *Chang. Biol.* **21**, 97–105. (doi:10.1111/gcb.12692)
- 425 28. Lahr EC, Dunn RR, Frank SD. 2018 Getting ahead of the curve: cities as surrogates for  
426 global change. In *Proceedings of the Royal Society B: Biological Sciences*,  
427 (doi:10.1098/rspb.2018.0643)
- 428 29. Melillo JM *et al.* 2011 Soil warming, carbon-nitrogen interactions, and forest carbon  
429 budgets. *Proc. Natl. Acad. Sci.* (doi:10.1073/pnas.1018189108)
- 430 30. Rinnan R, Michelsen A, Bååth E, Jonasson S. 2007 Fifteen years of climate change

- 431 manipulations alter soil microbial communities in a subarctic heath ecosystem. *Glob.*  
432 *Chang. Biol.* (doi:10.1111/j.1365-2486.2006.01263.x)
- 433 31. Weng Q, Lu D, Schubring J. 2004 Estimation of land surface temperature-vegetation  
434 abundance relationship for urban heat island studies. *Remote Sens. Environ.*  
435 (doi:10.1016/j.rse.2003.11.005)
- 436 32. Cadenasso ML, Pickett STA, Schwarz K. 2007 Spatial heterogeneity in urban ecosystems:  
437 Reconceptualizing land cover and a framework for classification. *Front. Ecol. Environ.*  
438 (doi:10.1890/1540-9295(2007)5[80:SHIUER]2.0.CO;2)
- 439 33. Buyantuyev A, Wu J. 2010 Urban heat islands and landscape heterogeneity: Linking  
440 spatiotemporal variations in surface temperatures to land-cover and socioeconomic  
441 patterns. *Landsc. Ecol.* (doi:10.1007/s10980-009-9402-4)
- 442 34. McIntyre NE. 2000 Ecology of Urban Arthropods: A Review and a Call to Action. *Ann.*  
443 *Entomol. Soc. Am.* (doi:10.1603/0013-8746(2000)093[0825:EOUAAR]2.0.CO;2)
- 444 35. Gardiner MM, Prajzner SP, Burkman CE, Albro S, Grewal PS. 2014 Vacant land  
445 conversion to community gardens: Influences on generalist arthropod predators and  
446 biocontrol services in urban greenspaces. *Urban Ecosyst.* (doi:10.1007/s11252-013-0303-  
447 6)
- 448 36. Borkent A *et al.* 2018 Remarkable fly (Diptera) diversity in a patch of Costa Rican cloud  
449 forest: Why inventory is a vital science. *Zootaxa.* (doi:10.11646/zootaxa.4402.1.3)
- 450 37. Brown B V. *et al.* 2018 Comprehensive inventory of true flies (Diptera) at a tropical site.  
451 *Commun. Biol.* (doi:10.1038/s42003-018-0022-x)
- 452 38. Disney RHL. 1990 Some myths and the reality of scuttle fly biology. *Antenna*
- 453 39. Hartop EA, Brown B V, Disney RHL. 2015 Opportunity in our Ignorance: Urban

- 454 Biodiversity Study Reveals 30 New Species and One New Nearctic Record for *Megaselia*  
455 (Diptera: Phoridae) in Los Angeles (California, USA). *Zootaxa*; Vol 3941, No 4 2 Apr.  
456 2015 (doi:10.11646/zootaxa.3941.4.1)
- 457 40. Hartop EA, Brown B V, Disney RHL. 2016 Flies from L.A., The Sequel: A further twelve  
458 new species of *Megaselia* (Diptera: Phoridae) from the BioSCAN Project in Los Angeles  
459 (California, USA). *Biodivers. Data J.* , e7756. (doi:10.3897/BDJ.4.e7756)
- 460 41. Vahmani P, Ban-Weiss GA. 2016 Impact of remotely sensed albedo and vegetation  
461 fraction on simulation of urban climate in WRF-urban canopy model: A case study of the  
462 urban heat island in Los Angeles. *J. Geophys. Res.* (doi:10.1002/2015JD023718)
- 463 42. Brown B V, Hartop EA. 2017 Big data from tiny flies: patterns revealed from over 42,000  
464 phorid flies (Insecta: Diptera: Phoridae) collected over one year in Los Angeles,  
465 California, USA. *Urban Ecosyst.* **20**, 521–534. (doi:10.1007/s11252-016-0612-7)
- 466 43. Melles S, Glenn S, Martin K. 2003 Urban bird diversity and landscape complexity:  
467 species–environment associations along a multiscale habitat gradient. *Conserv. Ecol.* **7**.
- 468 44. Keeley JE, Swift CC. 2011 Biodiversity and Ecosystem Functioning in Mediterranean-  
469 Climate California. (doi:10.1007/978-3-642-78881-9\_3)
- 470 45. Roth M, Oke TR, Emery WJ. 1989 Satellite-derived urban heat islands from three coastal  
471 cities and the utilization of such data in urban climatology. *Int. J. Remote Sens.*  
472 (doi:10.1080/01431168908904002)
- 473 46. Witiw MR, LaDochy S. 2008 Trends in fog frequencies in the Los Angeles Basin. *Atmos.*  
474 *Res.* (doi:10.1016/j.atmosres.2007.11.010)
- 475 47. Townes H. 1972 A light-weight Malaise trap. *Entomol. News* **83**, 239–247.
- 476 48. Cayelan CC, Cottingham KL. 2016 Cross-scale Perspectives: Integrating Long-term and

- 477 High-frequency Data into Our Understanding of Communities and Ecosystems. *Bull.*  
478 *Ecol. Soc. Am.* **97**, 129–132. (doi:10.1002/bes2.1205)
- 479 49. NOAA. 2019 Climate Data Online. See <https://www.ncdc.noaa.gov/cdo-web/> (accessed  
480 on 20 September 2001).
- 481 50. Warren II RJ, Bayba S, Krupp KT. 2018 Interacting effects of urbanization and coastal  
482 gradients on ant thermal responses. *J. Urban Ecol.* (doi:10.1093/jue/juy026)
- 483 51. Hartop EA, Gonzalez LA, Brown B V. 2018 Backyard biodiversity: Unraveling life  
484 histories of the new fly species discovered by the BioSCAN Project proves harder than  
485 first assumed. *J. Negat. Results* **12**.
- 486 52. Pinheiro J, Bates D, DebRoy S, Sarkar D. 2007 *nlme: Linear and Nonlinear Mixed Effects*  
487 *Models*.
- 488 53. Trumble JT, Pienkowski RL. 1979 Development and survival of *Megaselia scalaris*  
489 (Diptera: Phoridae) at selected temperatures and photoperiods. *Proc Entomol Soc Wash*  
490 **81**, 207–210.
- 491 54. Paradis E, Claude J, Strimmer K. 2004 APE: Analyses of phylogenetics and evolution in  
492 R language. *Bioinformatics* (doi:10.1093/bioinformatics/btg412)
- 493 55. Oksanen J *et al.* 2013 Vegan: community ecology package. *R Packag. Version 2.9*  
494 (doi:10.1093/molbev/msv334)
- 495 56. Poos MS, Jackson DA. 2012 Addressing the removal of rare species in multivariate  
496 bioassessments: The impact of methodological choices. *Ecol. Indic.*  
497 (doi:10.1016/j.ecolind.2011.10.008)
- 498 57. Suarez A V, Case TJ. 2003 9 The Ecological Consequences of a Fragmentation Mediated  
499 Invasion : The Argentine Ant , *Linepithema humile* , in Southern California. **162**.

- 500 58. Hartop E, Brown B. 2014 The tip of the iceberg: a distinctive new spotted-wing *Megaselia*  
501 species (Diptera: Phoridae) from a tropical cloud forest survey and a new, streamlined  
502 method for *Megaselia* descriptions. *Biodivers. Data J.* (doi:10.3897/BDJ.2.e4093)
- 503 59. Brown B V, Hartop EA. 2017 Mystery mushroom malingerers: *Megaselia marquezii*  
504 Hartop et al. 2015 (Diptera: Phoridae). *Biodivers. Data J.* (doi:10.3897/BDJ.5.e15052)
- 505 60. Araújo JPM, Hughes DP. 2016 Diversity of Entomopathogenic Fungi. Which Groups  
506 Conquered the Insect Body? In *Advances in Genetics*, (doi:10.1016/bs.adgen.2016.01.001)
- 507 61. Ramoska WA. 1984 The influence of relative humidity on *Beauveria bassiana* infectivity  
508 and replication in the chinch bug, *Blissus leucopterus*. *J. Invertebr. Pathol.*  
509 (doi:10.1016/0022-2011(84)90085-5)
- 510 62. Dunn RR, Gavin MC, Sanchez MC, Solomon JN. 2006 The pigeon paradox: Dependence  
511 of global conservation on urban nature. *Conserv. Biol.* (doi:10.1111/j.1523-  
512 1739.2006.00533.x)
- 513 63. Dale AG, Frank SD. 2018 Urban plants and climate drive unique arthropod interactions  
514 with unpredictable consequences. *Curr. Opin. Insect Sci.*  
515 (doi:10.1016/J.COIS.2018.06.001)
- 516 64. Youngsteadt E, Ernst AF, Dunn RR, Frank SD. 2017 Responses of arthropod populations  
517 to warming depend on latitude: evidence from urban heat islands. *Glob. Chang. Biol.*  
518 (doi:10.1111/gcb.13550)
- 519 65. Diamond SE, Chick L, Perez A, Strickler SA, Martin RA. 2017 Rapid evolution of ant  
520 thermal tolerance across an urban-rural temperature cline. *Biol. J. Linn. Soc.* **121**, 248–  
521 257. (doi:10.1093/biolinnean/blw047)
- 522 66. I. BK, Luc DM. 2018 City life on fast lanes: urbanization induces an evolutionary shift

- 523 towards a faster life style in the water flea *Daphnia*. *Funct. Ecol.* **0**. (doi:10.1111/1365-  
524 2435.13184)
- 525 67. Tüzün N, Op de Beeck L, Brans KI, Janssens L, Stoks R. 2017 Microgeographic  
526 differentiation in thermal performance curves between rural and urban populations of an  
527 aquatic insect. *Evol. Appl.* (doi:10.1111/eva.12512)
- 528 68. Burghardt KT, Tallamy DW, Gregory Shriver W. 2009 Impact of native plants on bird  
529 and butterfly biodiversity in suburban landscapes. *Conserv. Biol.* (doi:10.1111/j.1523-  
530 1739.2008.01076.x)
- 531 69. Beninde J, Veith M, Hochkirch A. 2015 Biodiversity in cities needs space: A meta-  
532 analysis of factors determining intra-urban biodiversity variation. *Ecol. Lett.*  
533 (doi:10.1111/ele.12427)
- 534 70. Snep RPH, Opdam PFM, Baveco JM, WallisDeVries MF, Timmermans W, Kwak RGM,  
535 Kuypers V. 2006 How peri-urban areas can strengthen animal populations within cities: A  
536 modeling approach. *Biol. Conserv.* (doi:10.1016/j.biocon.2005.06.034)
- 537 71. Kearns CA, Oliveras DM. 2009 Environmental factors affecting bee diversity in urban and  
538 remote grassland plots in Boulder, Colorado. *J. Insect Conserv.* (doi:10.1007/s10841-009-  
539 9215-4)
- 540 72. Longino JT, Colwell RK. 1997 Biodiversity assessment using structured inventory:  
541 Capturing the ant fauna of a tropical rain forest. *Ecol. Appl.* (doi:10.1890/1051-  
542 0761(1997)007[1263:BAUSIC]2.0.CO;2)
- 543 73. Hallmann CA *et al.* 2017 More than 75 percent decline over 27 years in total flying insect  
544 biomass in protected areas. *PLoS One* (doi:10.1371/journal.pone.0185809)
- 545 74. Dickinson JL, Zuckerberg B, Bonter DN. 2010 Citizen Science as an Ecological Research



546 Tool: Challenges and Benefits. *Annu. Rev. Ecol. Evol. Syst.* (doi:10.1146/annurev-ecolsys-  
547 102209-144636)

548 75. Wolkovich EM, Regetz J, O'Connor MI. 2012 Advances in global change research  
549 require open science by individual researchers. *Glob. Chang. Biol.* (doi:10.1111/j.1365-  
550 2486.2012.02693.x)

551 76. Theobald EJ *et al.* 2015 Global change and local solutions: Tapping the unrealized  
552 potential of citizen science for biodiversity research. *Biol. Conserv.*  
553 (doi:10.1016/j.biocon.2014.10.021)

554

555

556 Table 1. Full model evaluation of phorid fly biodiversity across 30 sites in urban Los Angeles.

| Response variable | Model parameter               | Estimate | SEM     | DF  | T     | p       |
|-------------------|-------------------------------|----------|---------|-----|-------|---------|
| Abundance         | (Intercept)                   | 87.751   | 488.103 | 313 | 0.18  | 0.857   |
|                   | log(min RH <sup>2</sup> )     | 0.000    | 0.000   | 313 | -0.22 | 0.827   |
|                   | min RH                        | -0.009   | 0.017   | 313 | -0.49 | 0.622   |
|                   | log(min soil T <sup>2</sup> ) | 0.000    | 0.002   | 313 | -0.19 | 0.849   |
|                   | min soil T                    | 0.048    | 0.065   | 313 | 0.74  | 0.459   |
|                   | log(mean air T <sup>2</sup> ) | -0.019   | 0.003   | 313 | -5.79 | <0.0001 |
|                   | mean air T                    | 0.673    | 0.133   | 313 | 5.07  | <0.0001 |
|                   | Latitude                      | 1.805    | 2.857   | 25  | 0.63  | 0.533   |
|                   | Longitude                     | 1.293    | 3.728   | 25  | 0.35  | 0.732   |
|                   | distance to protected area    | 0.000    | 0.001   | 25  | 0.21  | 0.839   |

|                             |                               |          |         |     |       |         |
|-----------------------------|-------------------------------|----------|---------|-----|-------|---------|
| Richness                    | (Intercept)                   | 337.215  | 501.628 | 313 | 0.67  | 0.502   |
|                             | log(mean RH <sup>2</sup> )    | -0.001   | 0.000   | 313 | -3.27 | 0.001   |
|                             | mean RH                       | 0.109    | 0.034   | 313 | 3.25  | 0.001   |
|                             | log(min soil T <sup>2</sup> ) | -0.003   | 0.002   | 313 | -1.33 | 0.185   |
|                             | min soil T                    | 0.078    | 0.068   | 313 | 1.15  | 0.251   |
|                             | log(mean air T <sup>2</sup> ) | -0.017   | 0.003   | 313 | -4.88 | <0.0001 |
|                             | mean air T                    | 0.637    | 0.141   | 313 | 4.53  | <0.0001 |
|                             | Latitude                      | 2.883    | 2.936   | 25  | 0.98  | 0.336   |
|                             | Longitude                     | 3.745    | 3.831   | 25  | 0.98  | 0.338   |
|                             | distance to protected area    | 0.000    | 0.001   | 25  | -0.08 | 0.935   |
| Evenness                    | (Intercept)                   | 107.709  | 58.598  | 222 | 1.84  | 0.067   |
|                             | I(temp_air_min <sup>2</sup> ) | 0.001    | 0.001   | 222 | 1.70  | 0.091   |
|                             | temp_air_min                  | -0.024   | 0.012   | 222 | -1.98 | 0.049   |
|                             | Latitude                      | -0.306   | 0.348   | 25  | -0.88 | 0.388   |
|                             | Longitude                     | 0.818    | 0.446   | 25  | 1.83  | 0.079   |
|                             | distance to protected area    | -0.00014 | 0.00007 | 25  | -2.15 | 0.042   |
| <i>M. agarici</i> abundance | (Intercept)                   | -72.628  | 390.116 | 313 | -0.19 | 0.852   |
|                             | log(min RH <sup>2</sup> )     | 0.000    | 0.000   | 313 | 0.71  | 0.476   |
|                             | min RH                        | -0.013   | 0.014   | 313 | -0.89 | 0.375   |
|                             | log(min soil T <sup>2</sup> ) | -0.002   | 0.002   | 313 | -1.05 | 0.296   |
|                             | min soil T                    | 0.025    | 0.053   | 313 | 0.47  | 0.640   |
|                             | log(mean air T <sup>2</sup> ) | -0.014   | 0.003   | 313 | -5.13 | <0.0001 |
|                             | mean air T                    | 0.532    | 0.109   | 313 | 4.90  | <0.0001 |

|                            |       |       |    |      |       |
|----------------------------|-------|-------|----|------|-------|
| impervious surface         | 0.885 | 0.721 | 24 | 1.23 | 0.232 |
| Latitude                   | 2.631 | 2.351 | 24 | 1.12 | 0.274 |
| Longitude                  | 0.178 | 3.070 | 24 | 0.06 | 0.954 |
| distance to protected area | 0.000 | 0.000 | 24 | 0.66 | 0.513 |

557

558 **Figure 1. Map of BioSCAN sites where phorid flies and climatic variables were sampled.**

559 Dot size represents mean daily phorid fly species caught in traps, and color represents mean

560 annual air temperatures.

561

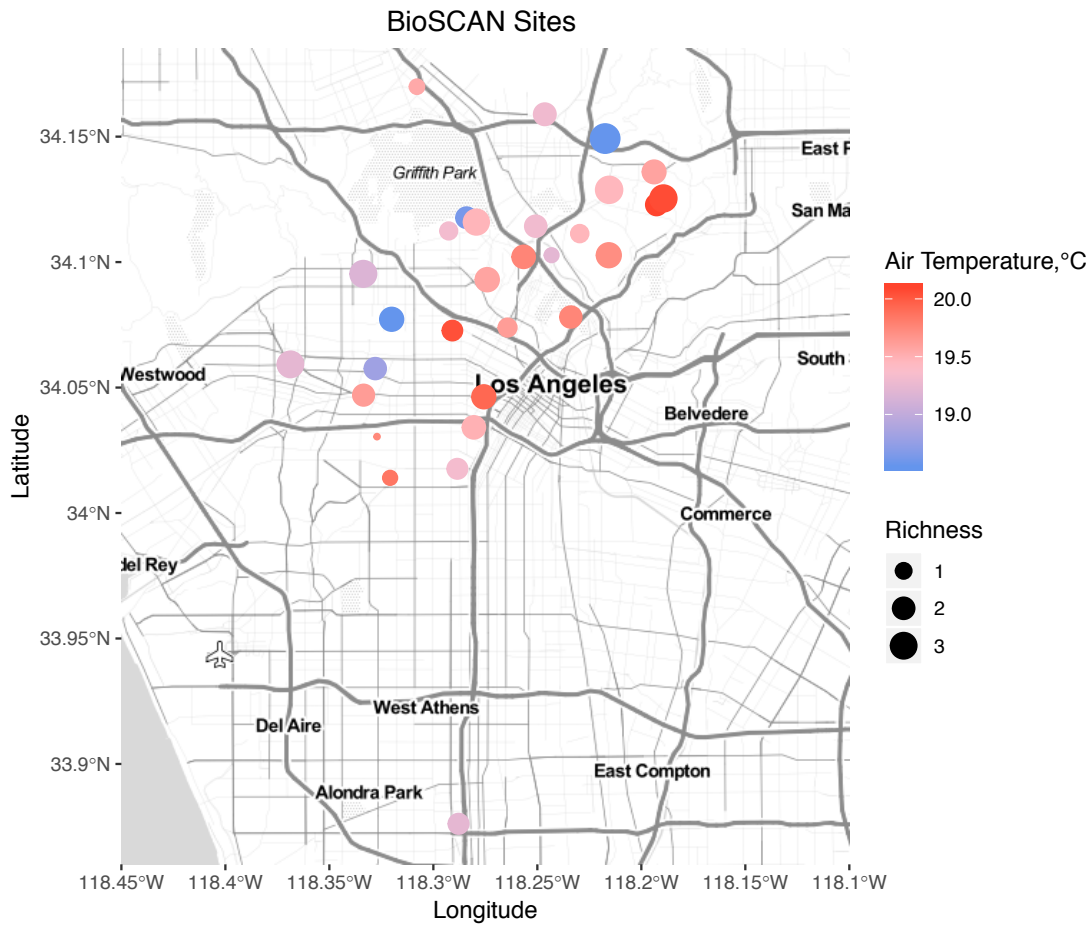

562

563

564

565 **Figure 2. Thermal responses to landscape characteristics.** Mean annual air temperature is not  
566 associated with a) impervious surface, nor with b) elevation.

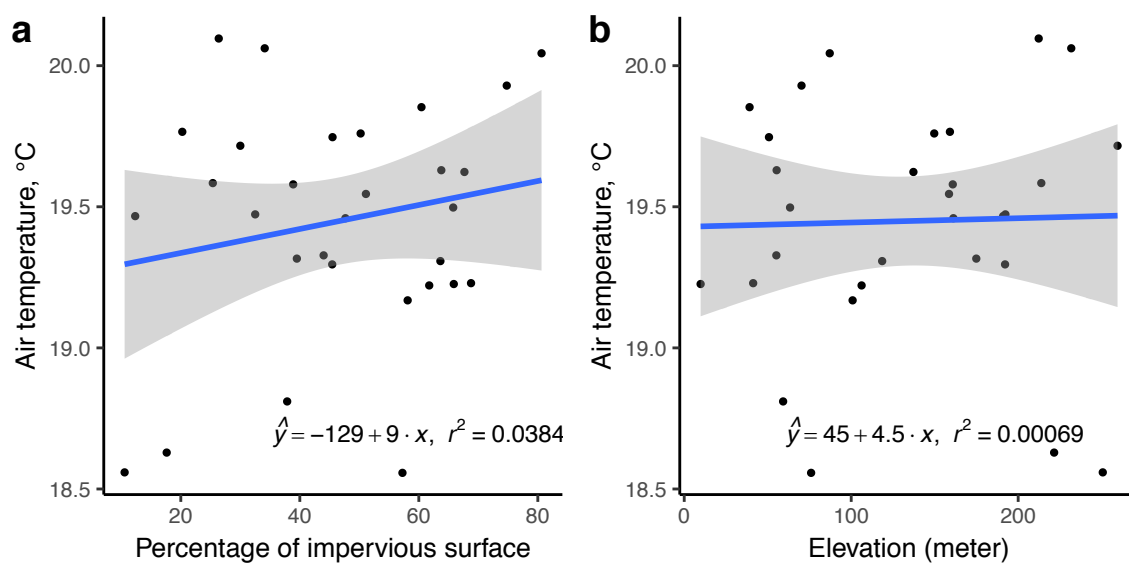

567

568

569 **Figure 3. Phorid fly abundance and richness responses to temperature.** a) Total abundance  
570 of phorid flies caught in each trap per sampling period, b) abundance of the most prevalent  
571 species, *M. agaraci*, and c) total species richness per sampling period. The x-axis represents  
572 mean air temperature the week prior to sampling, and regression lines represent best fits.

573

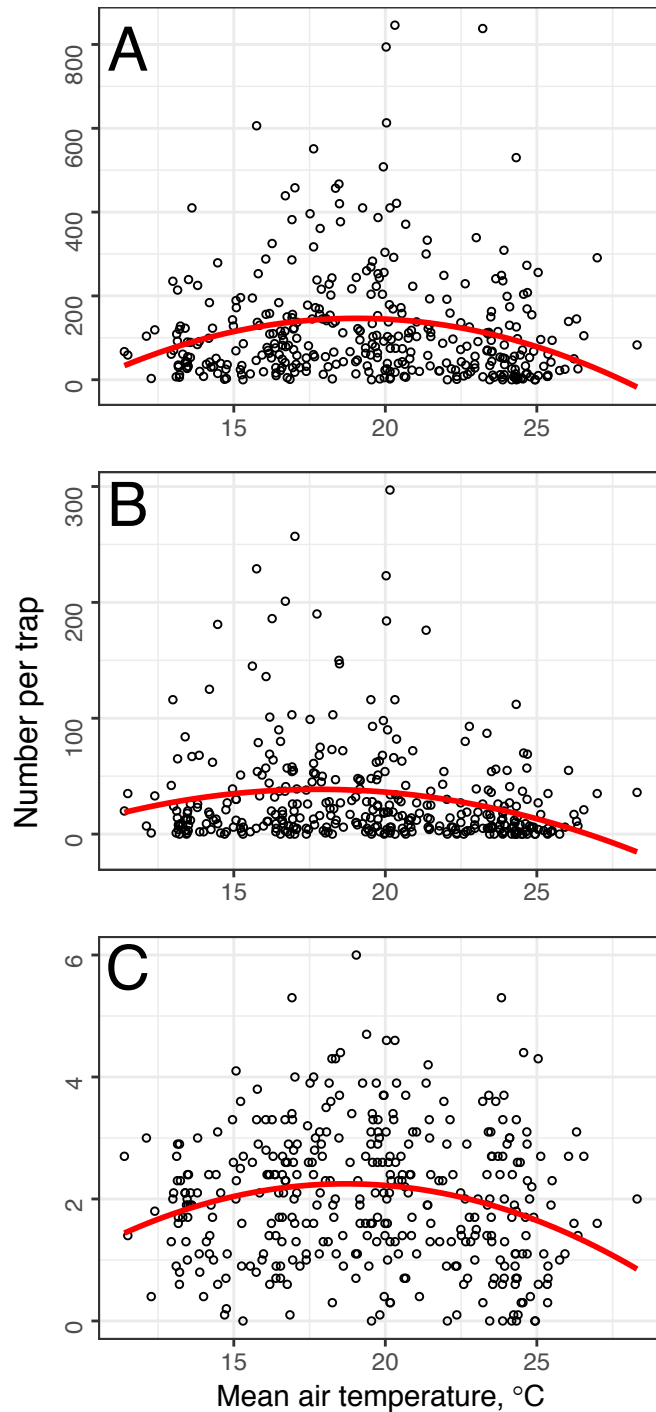

574 **Figure 4. Non-metric multidimensional scaling of phorid fly communities from urban Los**  
575 **Angeles backyard sampling stations.** The species are superimposed with environmental fit  
576 vectors for minimum air temperature ( $r^2= 0.26, p= 0.02$ ), normalized difference vegetation index  
577 within a 50-meter radius of the site (NDVI;  $r^2= 0.03, p= 0.65$ ), distance to the nearest natural  
578 area ( $r^2= 0.01, p= 0.92$ ), relative humidity ( $r^2= 0.04, p= 0.63$ ), latitude ( $r^2=0.04, p=0.61$ ) and  
579 longitude ( $r^2= 0.04, p= 0.56$ ). Most common species names are plotted (with captures >500  
580 individuals). NMDS 2D stress= 0.13.

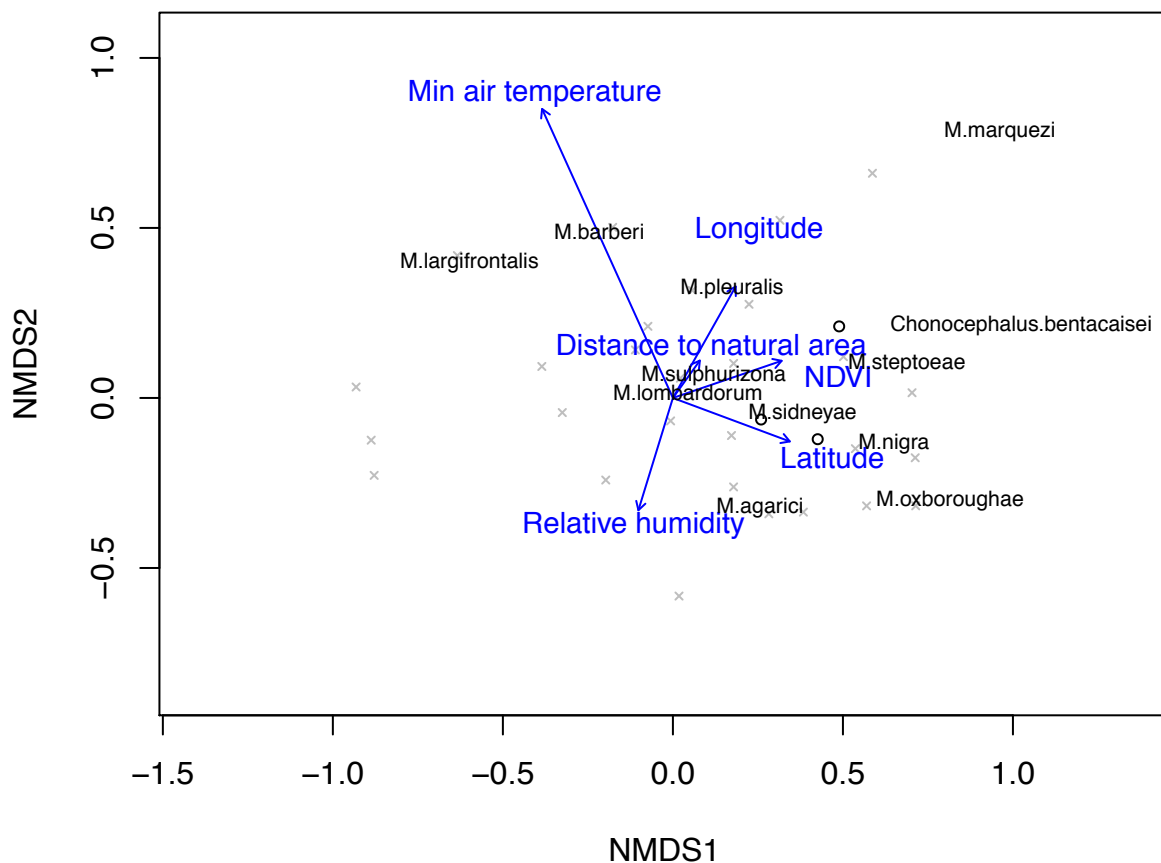

581
